# Supplementary material
Source: PubMed Central journal article supplement (PMC2747471)
Supplement: NIHMS134845-supplement-Supplementary_Data.pdf [file NIHMS134845-supplement-Supplementary_Data.pdf]

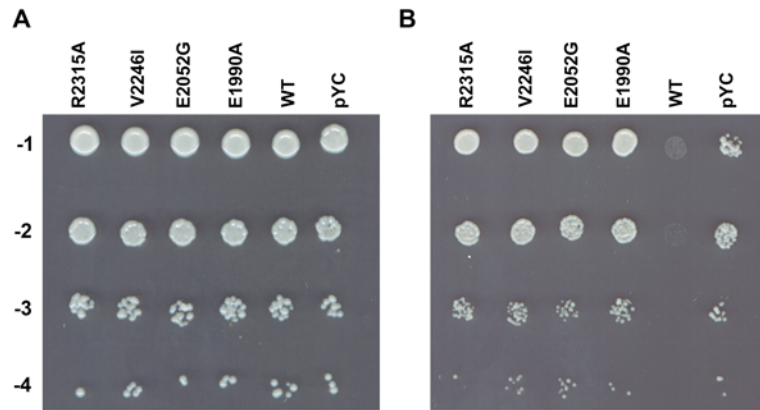

**Fig. S1.** Mutations in  $ACD_{Vc}$  that have decreased levels of actin cross-linking activity in HeLa cells, do not have differences in viability when expressed in yeast. Dilutions of *Sc* containing either pYC, pYC-ACD (WT), or pYC-ACD with the indicated mutants, were spotted onto plates containing either Glu (A) or gal and raf (B) and grown for 48 hrs at 30°C.

**Table S1.** Oligonucleotide primers used in this study. Restriction enzyme recognition sequences are underlined.

| Name                    | Sequence 5'-3'                                          |
|-------------------------|---------------------------------------------------------|
| <i>ACD LSM</i>          |                                                         |
| ACDentr UP              | CACCATG <u>AGATCT</u> CAACCAACGGGTCAACTGG               |
| ACDentr DOWN            | <u>GCTAGCTCGATACTCCTGATACCAAG</u>                       |
| <i>Ala Substitution</i> |                                                         |
| S1986A sense            | GCCATTTTCGCATCGACAGCAATTGGTATAGAAAATGAGTTATC            |
| S1986A anti             | GATAACTCATTTTTCTATACCAATTGCTGTGCGATGCGAAATGGC           |
| E1990A sense            | CATCCATTGGTATAGCAAATGAGCTCTCCGGTCTGTCCGG                |
| E1990A anti             | CCGGACAGACCGGAGAGCTCATTGCTATACCAATGGATG                 |
| N1991A sense            | CATCCATTGGTATAGAAGCTGAGTTATCCGGTCTG                     |
| N1991A anti             | CAGACCGGATAACTCAGCTTCTATACCAATGGATG                     |
| N2003A sense            | TGGTTTTACCGAAAGCTTCAGCGCAGACTTTTTGG                     |
| N2003A anti             | CCAAAAGTCTGCGCTGAAGCTTTCGGTAAAACCA                      |
| S2004A sense            | GGTTTTACCGAAAAACGCAGCGCAGACTTTTTGGC                     |
| S2004A anti             | GCCAAAAGTCTGCGCTGCGTTTTTTCGGTAAAACC                     |
| T2023A sense            | ACCCATTGTTTCATGCTAGCCAAGGATATGAATCAAGG                  |
| T2023A anti             | CCTTGATTCATATCCTTGGCTAGCATGAACAATGGGT                   |
| K2024A sense            | CCATTGTTTCATGCTAACC GCGGATATGAATCAAGGTGG                |
| K2024A anti             | CCACCTTGATTCATATCCGCGGTTAGCATGAACAATGGG                 |
| D2025A sense            | GTTGTTTCATGCTAACCAAGGCTATGAATCAAGGTGGT                  |
| D2025A anti             | AACCACCTTGATTCATAGCCTTGGTTAGCATGAACAAC                  |
| <i>ACD Yeast</i>        |                                                         |
| pYC-ACD UP              | <u>GGTACCATGGGAAGTCAACCAACGGG</u>                       |
| pYC-ACD DOWN            | <u>TCTAGATGTGAGCGTCTCATGGTTATC</u>                      |
| pYC-ACD recomb UP       | GGAAGTCAACCAACGGGTCAACTGGC                              |
| pYC-ACD recomb DOWN     | TGTGAGCGTCTCATGGTTATCAGTATAAGGAGCGGTAATTTTC             |
| Glu1992Ala              | TTCGCATCGACATCCATTGGTATAGAAAATGCGTTATCC                 |
| Glu2052Ala              | CAATGATATTCAAGGGGTGAACAACCTGGCAGACGCATACGATTGCACTGGTTAC |
| Ser2058Ala              | GTGAACAACCTGGCAGACGCATACGATTGAACTGGTTACATATCCTGCTGAAATC |
| His2083Ala              | GAGGCAATGCTATGGCTTGC GAAAGAGTTTACCGATGCTATCAATCAGT      |
| Asn2085Ala              | CTATGGCTTGC GAAAGAGTTTACCGATCATATCGCTCAGTCTAAC          |
| Ser2087Ala              | GCGAAAGAGTTTACCGATCATATCAATCAGGCTAACCAACAAAGC           |
| His2089Ala              | GCGAAAGAGTTTACCGATCATATCAATCAGTCTAACGCCCAAAGC           |
| His2111Ala              | CGTTTCACTCTGGTTATATCGAACTCTAAGGCTCTTATTG                |
| Ser2133Ala              | GATGCACAAGGCAAGACCATAGGAATGACCCCTGCTGGCC                |
| Arg2155Ala              | GCGAAAGAATTTGGTACAAGCTCGTCGCCGGAAGTCGCACTGCTTGAATC      |
| Ser2159Ala              | GGTACAAGCTCGTCGCCGGAAGTCAGACTGCTTGAAGCTGCGCC            |
| Ser2195Ala              | GCACAAAATGTGTATGCCTATCTCACGGCTG                         |
| Lys2205Ala              | TCTGTCTATTCAAAAACAGCAGATTTGGCCGCAGAGTAT                 |
| Glu2313Ala R            | CTGCCGAAACGCAAATAAGATCGCTGGTTCAGGCTGTTGCACACTTCCTGTC    |
| Arg2315Ala R            | TACAAAGTCACTTAATGCACTCGGTACACTGGCAAACCTC                |
| Lys2327Ala R            | ACTTTCACCGTTGACGCTGTTGCGGGTA                            |
| Lys2337Ala R            | TTGCCGAGTCAAATGATCGAGTGCCGCAACATC                       |

**Table S2.** The location of each linker-scanning insertion and its ability to crosslink actin upon transient transfection and expression from the indicated plasmid in COS-7 cells. +, crosslinking indistinguishable from WT; -, no detectable crosslinking; nd, not determined.

| RtxA AA# | pDEST-ACD | pEGFP-ACD | RtxA AA# | pDEST-ACD | pEGFP-ACD |
|----------|-----------|-----------|----------|-----------|-----------|
| P1996    | +         | <i>nd</i> | L2092    | -         | -         |
| K1979    | -         | +         | L2095    | -         | -         |
| S1984    | -         | +         | K2110    | +         | <i>nd</i> |
| S1986    | -         | +         | I2121    | -         | +         |
| G1988    | -         | -         | P2132    | +         | <i>nd</i> |
| L1993    | -         | -         | A2137    | -         | -         |
| G1995    | -         | +         | S2149    | +         | <i>nd</i> |
| V1997    | -         | -         | S2151    | +         | <i>nd</i> |
| N2003    | -         | -         | E2153    | -         | +         |
| A2005    | -         | +         | L2167    | +         | <i>nd</i> |
| V2011    | +         | <i>nd</i> | L2180    | +         | <i>nd</i> |
| H2012    | +         | <i>nd</i> | D2181    | +         | <i>nd</i> |
| S2014    | -         | +         | N2188    | -         | +         |
| P2018    | +         | <i>nd</i> | Y2197    | -         | +         |
| L2022    | -         | -         | E2206    | -         | +         |
| G2029    | -         | +         | Y2210    | +         | <i>nd</i> |
| Y2031    | +         | <i>nd</i> | N2212    | -         | +         |
| N2033    | +         | <i>nd</i> | D2213    | -         | +         |
| Q2041    | +         | <i>nd</i> | F2221    | -         | +         |
| G2042    | +         | <i>nd</i> | W2237    | -         | -         |
| N2045    | +         | <i>nd</i> | L2249    | -         | +         |
| Q2047    | -         | +         | L2268    | +         | <i>nd</i> |
| T2048    | -         | +         | S2275    | -         | -         |
| H2049    | -         | +         | G2288    | -         | <i>nd</i> |
| T2050    | +         | +         | I2295    | +         | <i>nd</i> |
| Y2056    | -         | +         | V2303    | +         | <i>nd</i> |
| S2058    | -         | +         | Q2304    | +         | <i>nd</i> |
| E2067    | -         | +         | P2318    | -         | -         |
| L2074    | -         | -         | L2321    | +         | <i>nd</i> |
| W2075    | -         | +         | S2322    | +         | <i>nd</i> |
| L2076    | -         | -         | K2327    | +         | <i>nd</i> |
| A2077    | -         | +         | S2330    | +         | <i>nd</i> |
| K2078    | -         | +         | T2331    | +         | <i>nd</i> |
| E2079    | -         | +         | D2343    | +         | <i>nd</i> |
| S2087    | -         | +         | K2348    | +         | <i>nd</i> |

**Table S3.** Ala-substitutions in ACD constructed in either pEGFP-ACD or pYC-ACD based on LSM and error-prone PCR approaches. Each plasmid was screened for actin cross-linking in transiently transfected HeLa cells (pEGFP-ACD plasmids) or the ability to allow *S. cerevisiae* growth when plated on media containing galactose (pYC-ACD plasmids). The symbols in the pEGFP-ACD columns indicate; +, mutant displayed similar actin crosslinking as wild-type; -, mutant completely abolished actin crosslinking activity; +/-, mutant reduced actin crosslinking activity compared to wild-type. The symbols in the pYC-ACD column indicate functional ACD (no growth, (+)) or defective ACD (growth, (-)) on gal+raf plates. Not all mutations were constructed on both plasmids (*nd*).

| RtxA AA#  | pEGFP-ACD | pYC-ACD   | RtxA AA# | pEGFP-ACD | pYC-ACD   |
|-----------|-----------|-----------|----------|-----------|-----------|
| Wild-type | +         | +         | D2122    | +         | <i>nd</i> |
| S1986     | +         | <i>nd</i> | K2126    | +         | +         |
| E1990     | -         | -         | T2127    | +         | +         |
| N1991     | +         | <i>nd</i> | S2133    | <i>nd</i> | +         |
| E1992     | +/-       | -         | Q2135    | +         | <i>nd</i> |
| N2003     | +         | <i>nd</i> | T2138    | +         | <i>nd</i> |
| S2004     | +         | <i>nd</i> | S2159    | <i>nd</i> | +         |
| T2023     | +         | <i>nd</i> | S2195    | <i>nd</i> | +         |
| K2024     | +         | +         | K2205    | <i>nd</i> | +         |
| D2025     | +/-       | -         | N2224    | +         | <i>nd</i> |
| N2027     | +         | <i>nd</i> | T2229    | +         | <i>nd</i> |
| Q2028     | +         | <i>nd</i> | K2232    | +         | <i>nd</i> |
| S2058     | <i>nd</i> | +         | K2234    | +         | <i>nd</i> |
| R2069     | +         | <i>nd</i> | N2235    | +         | <i>nd</i> |
| K2070     | +         | <i>nd</i> | T2243    | +         | <i>nd</i> |
| L2074     | +         | <i>nd</i> | K2244    | +         | <i>nd</i> |
| L2076     | +         | <i>nd</i> | D2256    | +         | <i>nd</i> |
| H2089     | <i>nd</i> | +         | S2273    | +         | <i>nd</i> |
| L2092     | +         | <i>nd</i> | E2289    | +         | <i>nd</i> |
| L2095     | +         | <i>nd</i> | H2293    | +         | +         |
| S2097     | +         | <i>nd</i> | R2315    | +/-       | -         |
| D2099     | +         | <i>nd</i> | K2327    | <i>nd</i> | +         |
| R2101     | +         | <i>nd</i> | K2337    | <i>nd</i> | +         |
| H2111     | <i>nd</i> | +         |          |           |           |

**Table S4.** Ala-substitutions in ACD constructed in either pEGFP-ACD or pYC-ACD based on a structural alignment of the glutamine synthetase and  $\gamma$ -glutamylcysteine synthetase active site (**Fig. 5A**). The degree of actin cross-linking in HeLa cells transfected with each pEGFP-ACD plasmid was tested; +, indistinguishable from wild-type level of actin crosslinking; -, no actin crosslinking activity; +/-, reduced actin crosslinking activity compared to wild-type. The symbols in the pYC-ACD column indicate functional ACD (no growth, (+)) or defective ACD (growth, (-)) on gal+raf plates. Not all mutations were constructed on both plasmids (*nd*).

| <b>RtxA AA#</b> | <b>pEGFP-ACD</b> | <b>pYC-ACD</b> |
|-----------------|------------------|----------------|
| Wild-type       | +                | +              |
| E2052           | +/-              | -              |
| H2083           | <i>nd</i>        | -              |
| N2085           | <i>nd</i>        | +              |
| S2087           | <i>nd</i>        | +              |
| R2155           | <i>nd</i>        | +              |
| R2242           | +                | <i>nd</i>      |
| R2313           | +/-              | -              |
